# Supplementary material
Source: PubMed Central journal article supplement (PMC6342471)
Supplement: NIHMS1003655-supplement-Supplementary_Info.pdf [file NIHMS1003655-supplement-Supplementary_Info.pdf]

***Streptococcus pneumoniae* quorum sensing drives an asymmetric owner-intruder competitive strategy during host colonization via the competence regulon**

**Supplementary Information**

Pamela Shen<sup>1</sup>, John A Lees<sup>1</sup>, Gavyn Chern Wei Bee<sup>1</sup>, Sam P Brown<sup>2</sup>, and Jeffrey N Weiser<sup>1\*</sup>

<sup>1</sup>Department of Microbiology, New York University School of Medicine, New York, New York, USA.

<sup>2</sup>School of Biological Sciences, Georgia Institute of Technology. Atlanta, Georgia 30332, USA.

## Supplementary Methods

### Computational efficiency

#### ODE formulation

To improve computation speed when solving the ODE formulation, we used the analytic form of the Jacobian:

$$J = \begin{bmatrix} r_R \left( \frac{K-2R-\alpha_{CR}C}{K} \right) & -\frac{r_R R \alpha_{CR}}{K} \\ -\frac{r_C C \alpha_{CR}}{K} & r_C \left( \frac{K-2C-\alpha_{RC}R}{K} \right) \end{bmatrix}$$

#### CTMC formulation

| Event                       | Change          | Notation | Probability                                     |
|-----------------------------|-----------------|----------|-------------------------------------------------|
| Resident cell duplication   | $\Delta R = +1$ | $B_R$    | $r_R R$                                         |
| Challenger cell duplication | $\Delta C = +1$ | $B_C$    | $r_C C$                                         |
| Resident cell death         | $\Delta R = -1$ | $D_R$    | $r_R R \left( \frac{R+\alpha_{CR}C}{K} \right)$ |
| Challenger cell death       | $\Delta C = -1$ | $D_C$    | $r_C C \left( \frac{C+\alpha_{RC}R}{K} \right)$ |

The Gillespie algorithm uses exponentially distributed time steps with a mean equal to the total rates in the above table. At each time step one event from the above table is selected with a probability proportional to its rate. This algorithm, even when we optimised it with just-in-time compilation<sup>1</sup>, was very slow to run across the experimental conditions we used, and was therefore difficult to perform inferences or predictions with.

We then considered two alternatives to improve the runtime (Supplementary Table 6). The first was tau-leaping<sup>2</sup>, an extension to the Gillespie algorithm which simulates forward in discrete chunks of time, thereby allowing multiple transitions from the above table in each step by generating random Poisson deviates with a mean equal to the expected number of transitions in the time interval. Tau can be set programmatically to avoid negative population sizes<sup>3</sup>, however using the maximum rates for the parameters we estimated was slower than the basic Gillespie algorithm. We instead used  $\tau = 10^{-3}$  hrs, which empirically gave equivalent results in a much shorter computational time.

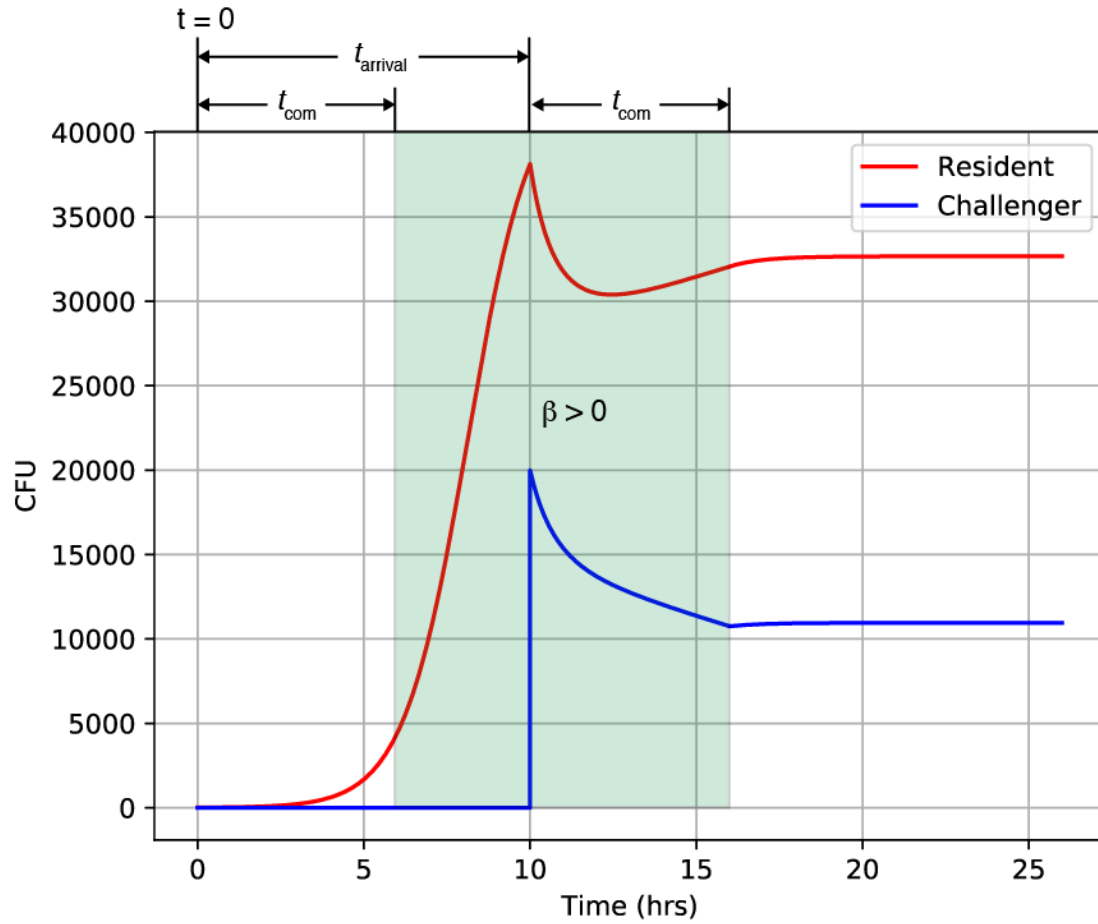

**Supplementary Figure 1: Times and Com regulon activation in the mathematical model.** This shows an example trajectory of resident and challenger density over time with  $t_{com} = 6$  hrs and  $t_{arrival} = 10$  hrs with the times relevant to the model marked at the top. The region shaded in green is when the Com regulon is active in the resident but not the challenger, giving it a competitive advantage.

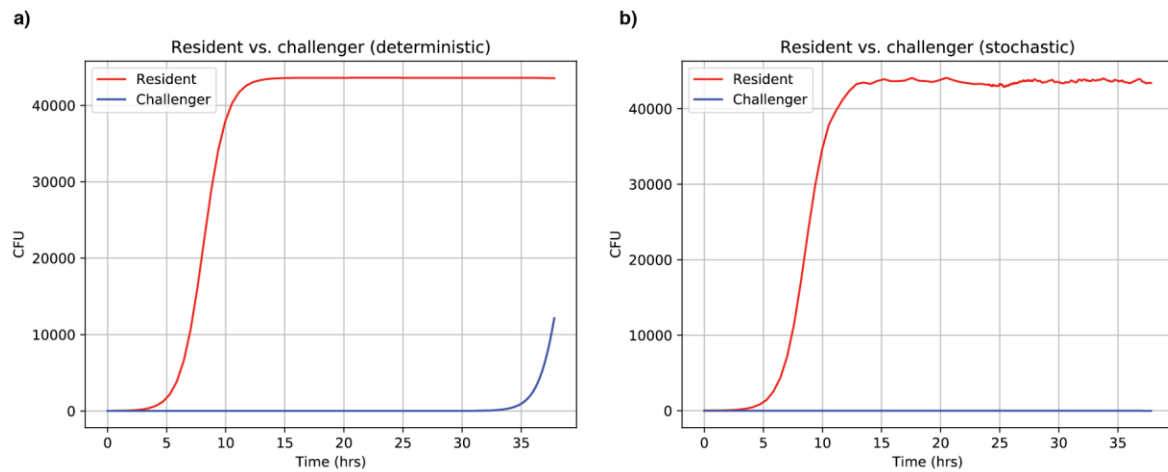

**Supplementary Figure 2: The ODE formulation does not accurately model zero populations at long times.** The resident and challenger population sizes as a function of time for a) the ODE formulation and b) the SDE formulation. The model was run with the same parameters in each case:  $\alpha_{CR}$  and  $\alpha_{RC}$  both set to 0.01;  $t_{arrival} = 24\text{h}$ ; initial population sizes 10 CFU. In b) zero is an absorbing state for each population, so once reached (the challenger is excluded) it cannot increase again.

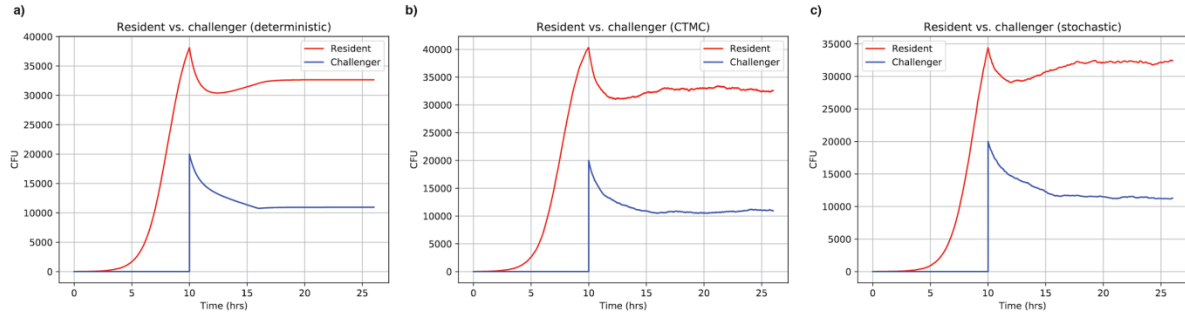

**Supplementary Figure 3: Example population trajectories for the three model formulations.** The model was run for isogenic resident and challenger, with  $t_{\text{arrival}} = 10$  a challenger inoculum of  $2 \times 10^4$  CFU and  $\beta = 0.1$ . a) ODE formulation; b) CTMC formulation (simulated with the Gillespie algorithm); c) SDE formulation.

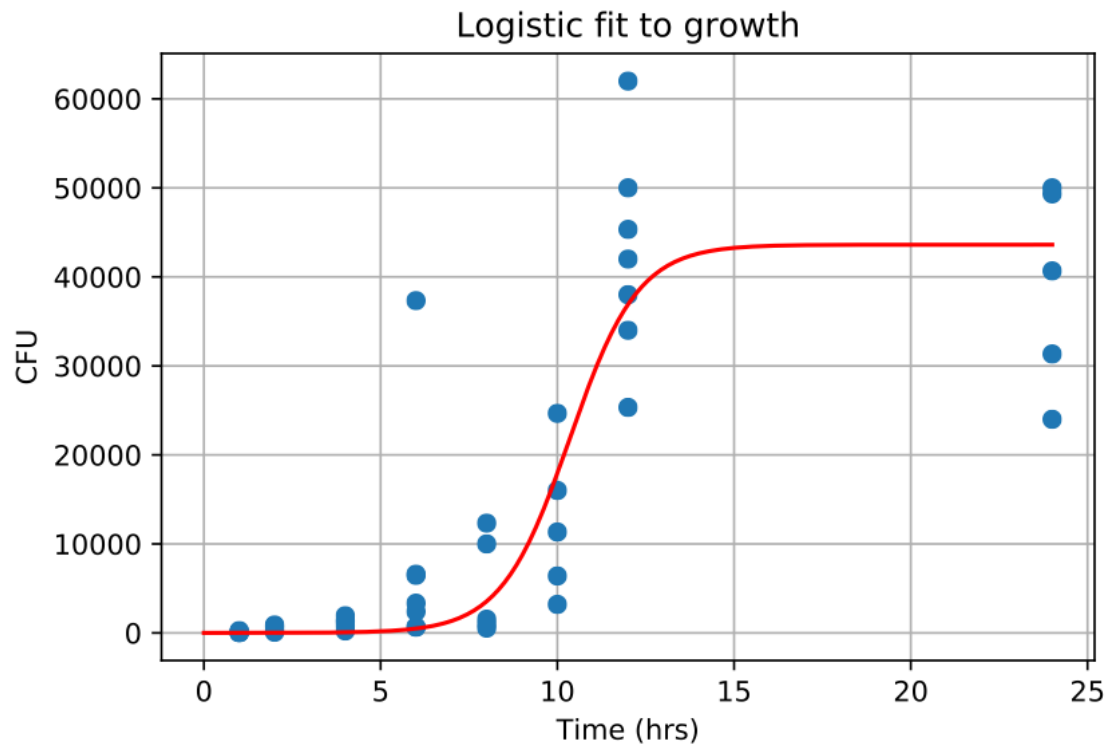

**Supplementary Figure 4: Fit of logistic growth to *in vivo* time series data from Figure 3c.** The blue dots are observations, and the red line is the least-squares fit with the estimated  $r$  and  $K$ .

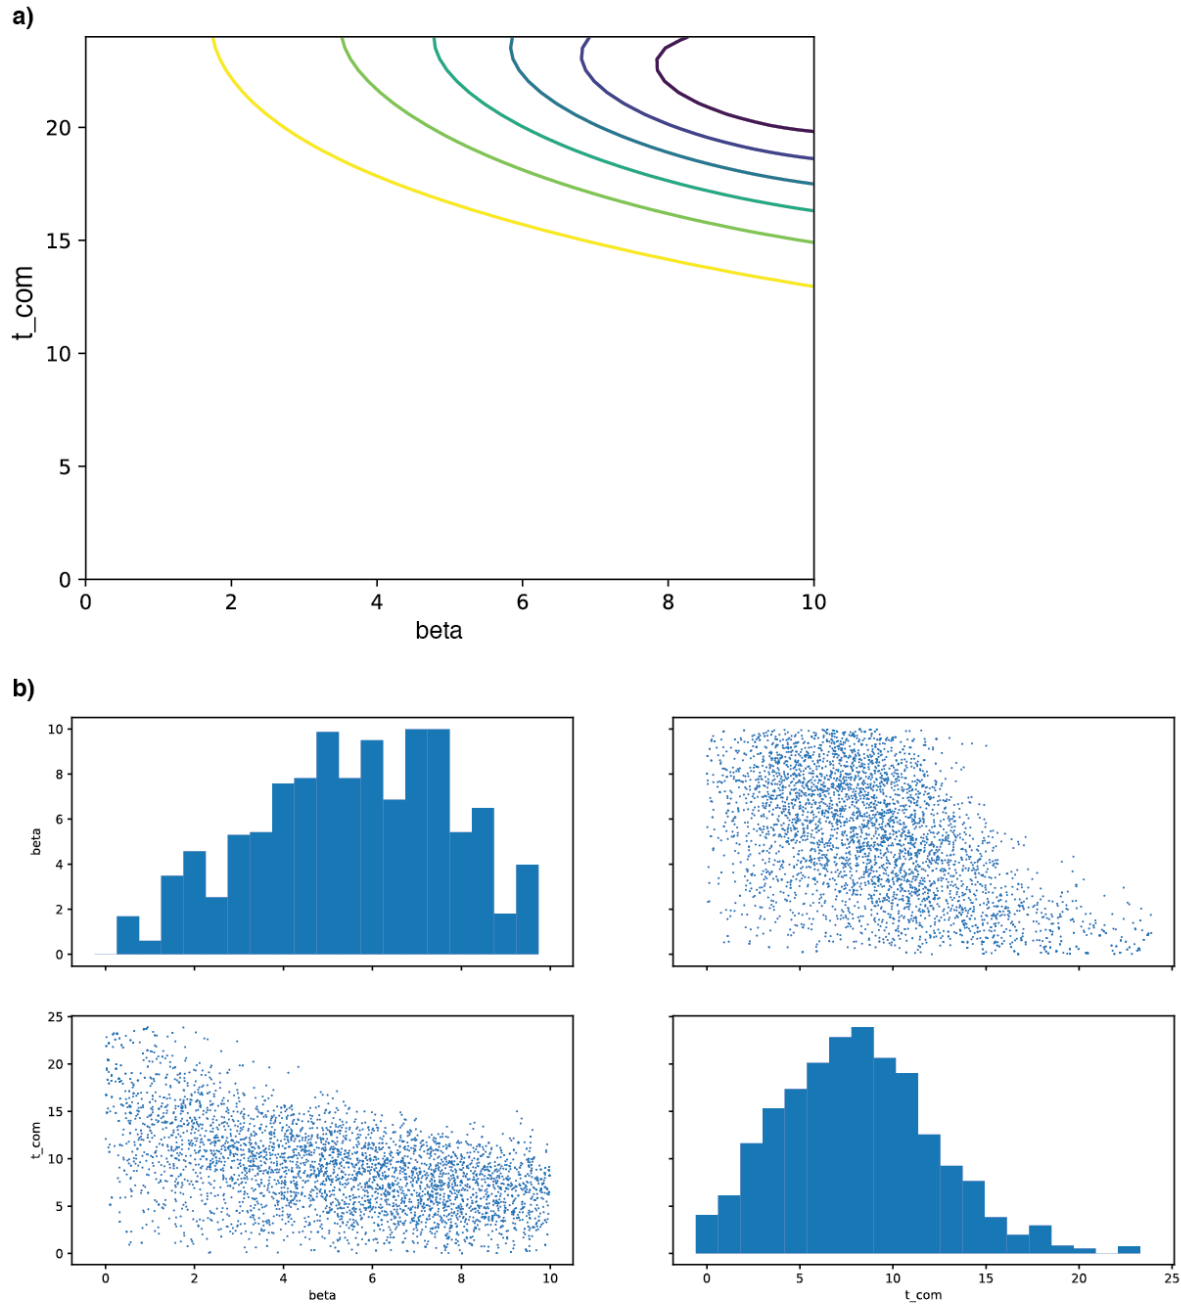

**Supplementary Figure 5: BOLFI fit to simulated data with extended priors.** Using priors  $t_{com} \sim U(0,24)$  and  $\beta \sim U(0,10)$  BOLFI fit to simulated data with  $t_{com} = 3$  and  $\beta = 1$ . a) Approximate posterior estimated by BOLFI. b) Samples from the joint and marginal approximate posterior distributions for  $\beta$  and  $t_{com}$ . Top row:  $\beta$ . The left panel is a histogram of the approximate marginal posterior, the right panel shows the approximate joint posterior with  $\beta$  on the x-axis and  $t_{com}$  on the y-axis. Bottom row:  $t_{com}$ . The left panel shows the approximate joint posterior with  $t_{com}$  on the x-axis and  $\beta$  on the y-axis, the right panel is a histogram of the approximate marginal posterior.

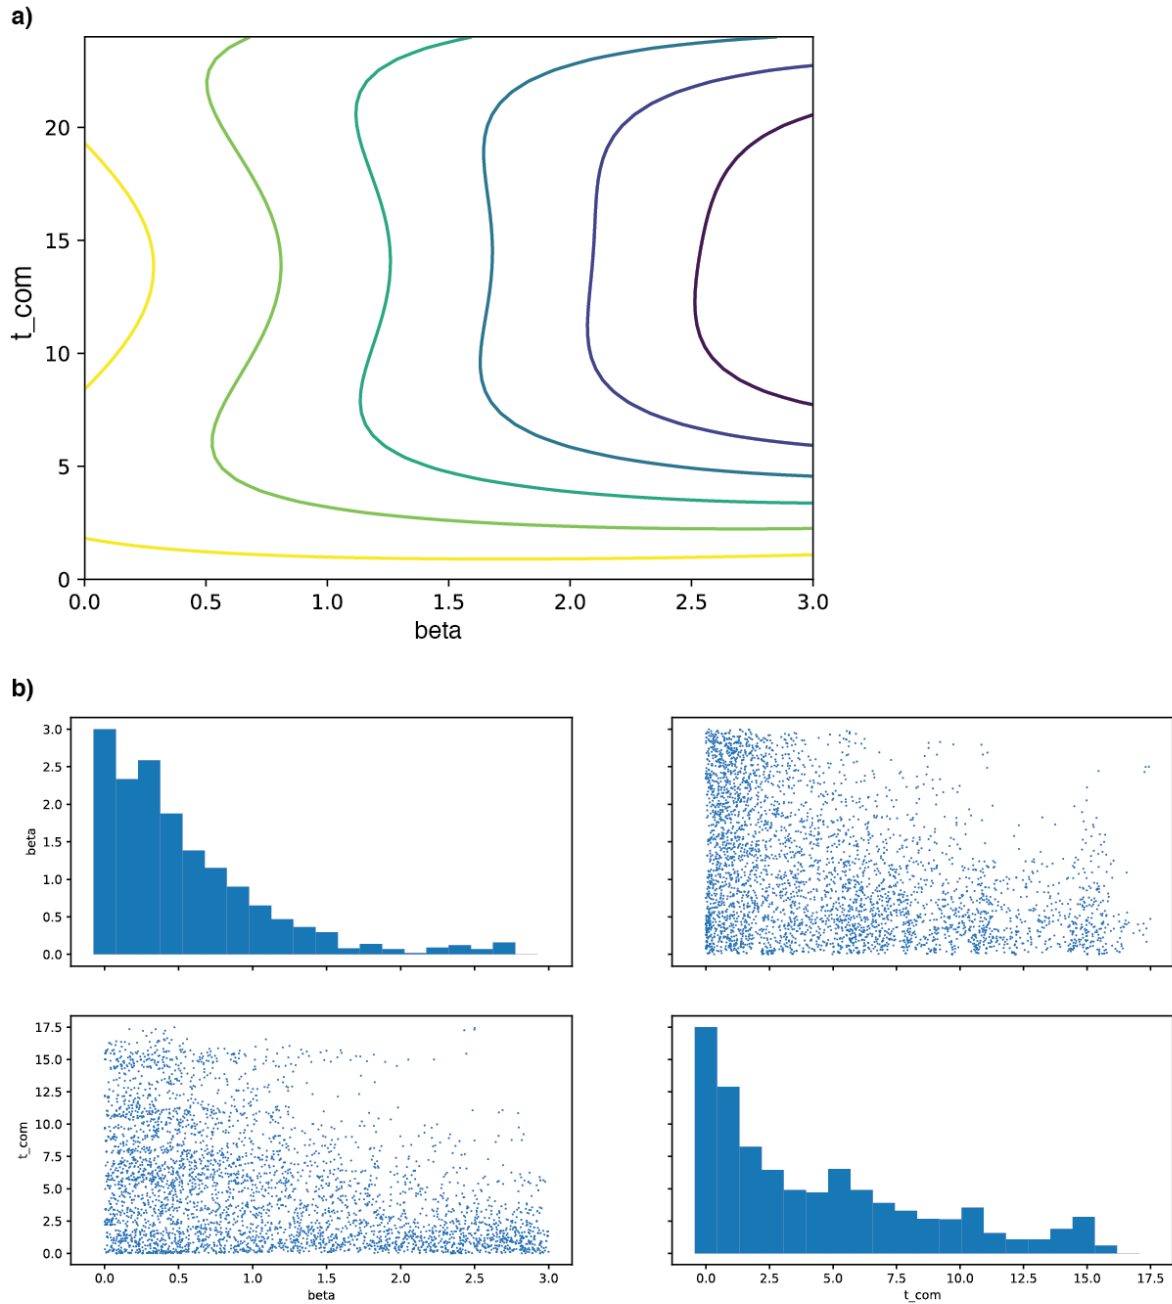

**Supplementary Figure 6: BOLFI fit to real data with extended priors.** Using priors  $t_{com} \sim U(0,24)$  and  $\beta \sim U(0,10)$  BOLFI fit to observed experimental data. Posterior means were  $t_{com} = 5.11$  hrs and  $\beta = 1.09$ . a) Approximate posterior estimated by BOLFI. b) Samples from the joint and marginal approximate posterior distributions for  $\beta$  and  $t_{com}$ . Top row:  $\beta$ . The left panel is a histogram of the approximate marginal posterior, the right panel shows the approximate joint posterior with  $\beta$  on the x-axis and  $t_{com}$  on the y-axis. Bottom row:  $t_{com}$ . The left panel shows the approximate joint posterior with  $t_{com}$  on the x-axis and  $\beta$  on the y-axis, the right panel is a histogram of the approximate marginal posterior.



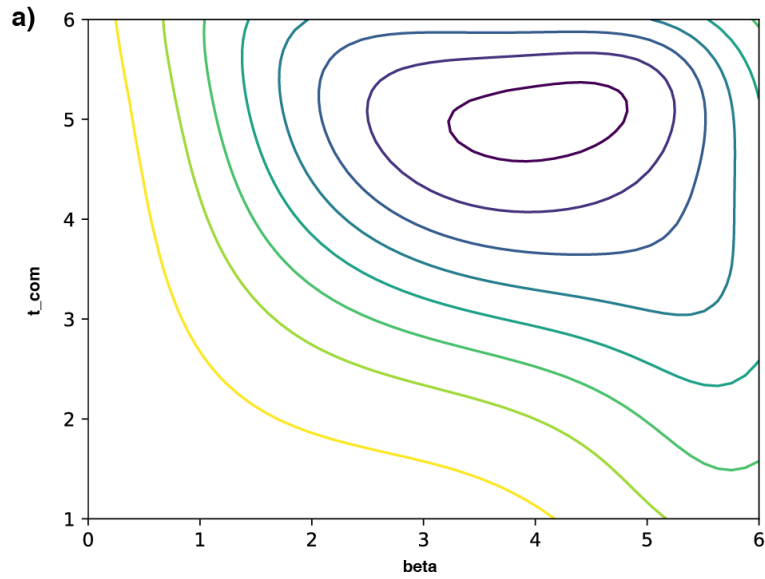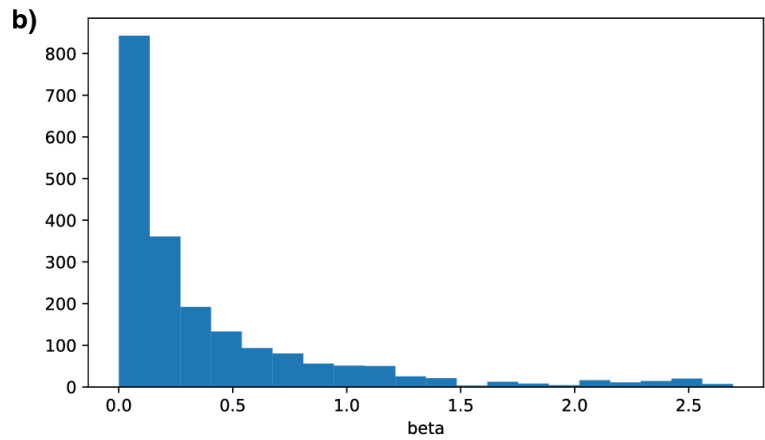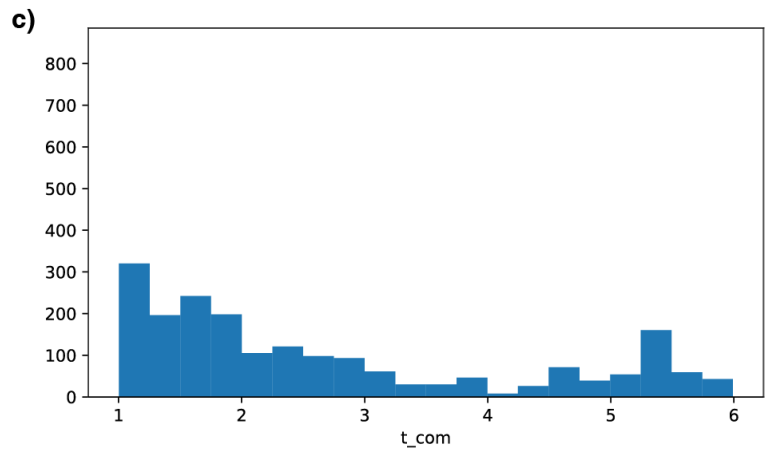

**Supplementary Figure 7: Example of BOLFI fit to model-simulated data with actual values  $\beta = 0.1$  and  $t_{com} = 5h$ .**  
 a) The approximate posterior likelihood function, shown as contours from yellow (high likelihood) to purple (low likelihood). b) 2000 samples from the posterior likelihood to give the marginal posterior for  $\beta$ . c) 2000 samples from the approximate posterior likelihood to give the marginal posterior for  $t_{com}$ .

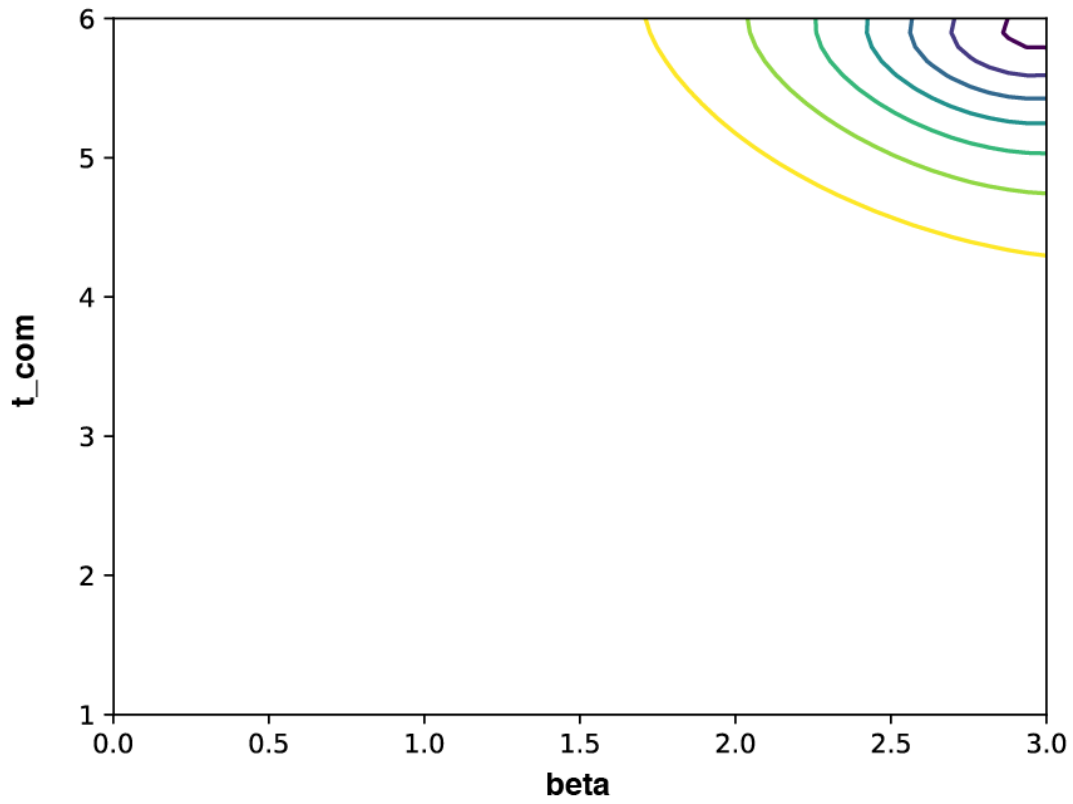

**Supplementary Figure 8: The approximate posterior likelihood function given the experimental data in Figure 1. Shown as contours from yellow (high likelihood) to purple (low likelihood).**

a)

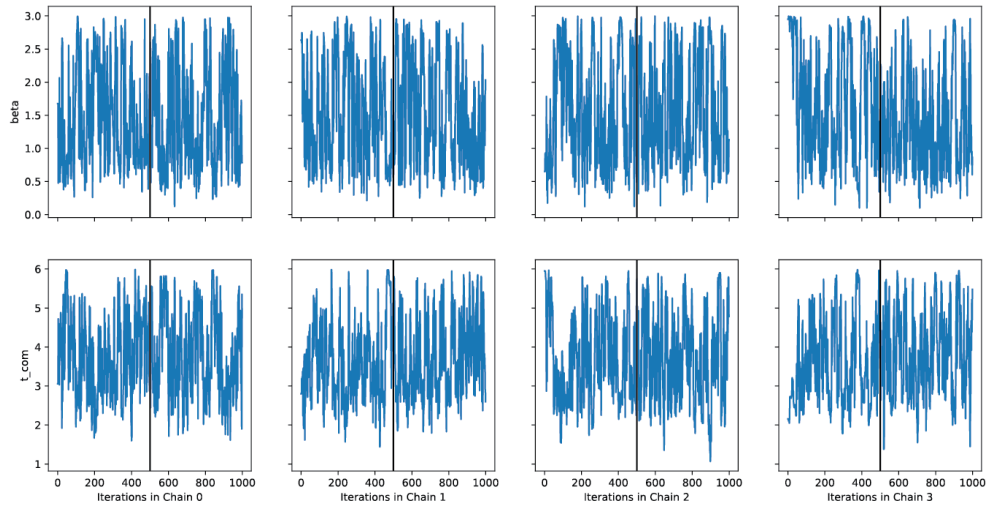

b)

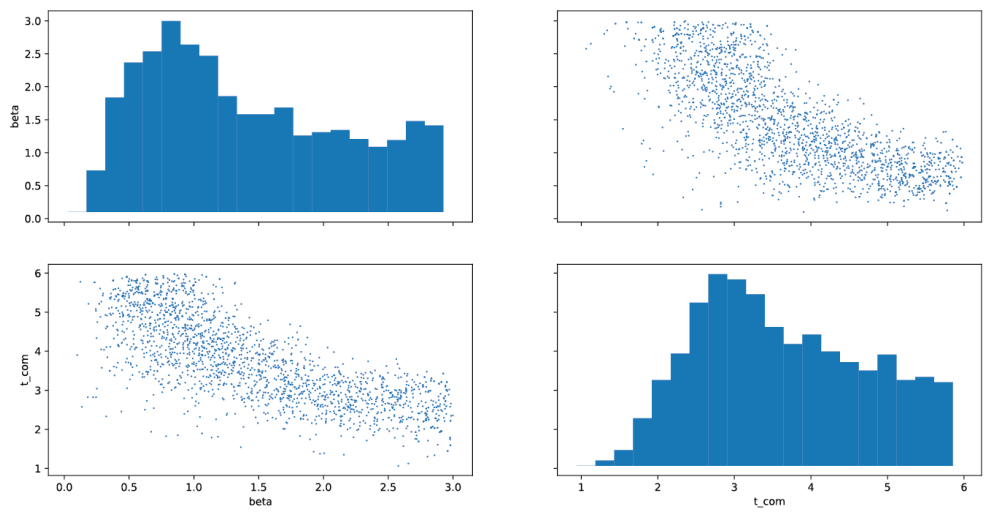

**Supplementary Figure 9: Samples from the posterior in supplementary Figure 5.** a) Values for  $\beta$  (top row) and  $t_{com}$  (bottom row) at each step in four chains (columns). Samples to the left of black vertical lines were discarded as burn-in. b) Samples from the joint and marginal approximate posterior distributions for  $\beta$  (top row) and  $t_{com}$  (bottom row).

### Challenger colonization (6A)

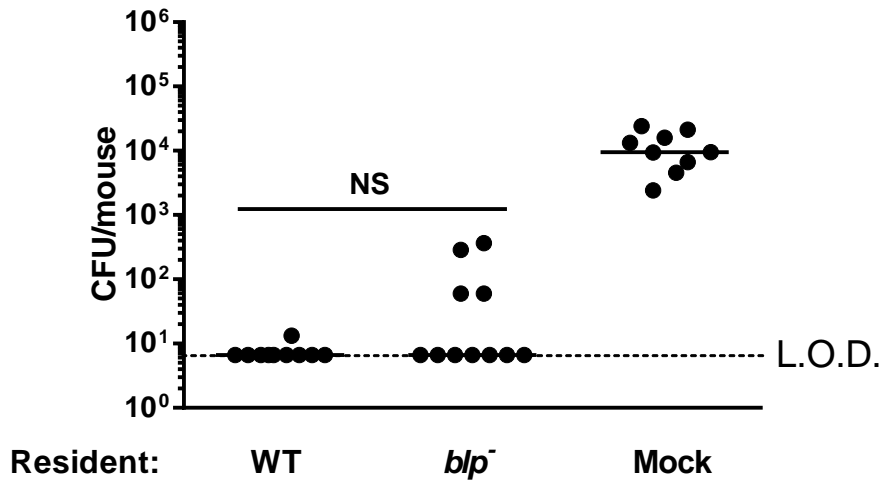

**Supplementary Figure 10: Blp does not contribute to asymmetric competition.** 4-5 day old pups were intranasally inoculated with 10<sup>3</sup> CFU of serotype 6A WT or a *blp*<sup>-</sup> mutant for 15h. An isogenic challenger was then introduced at 10<sup>1</sup> CFU. Challenger colonization density was determined 3 days later in nasal lavage samples. Groups were compared by Kruskal–Wallis one-way analysis of variance, NS: p>0.9999, n=9-11. Median values are shown. L.O.D., limit of detection, NS, non-significant.

### Challenger colonization (23F)

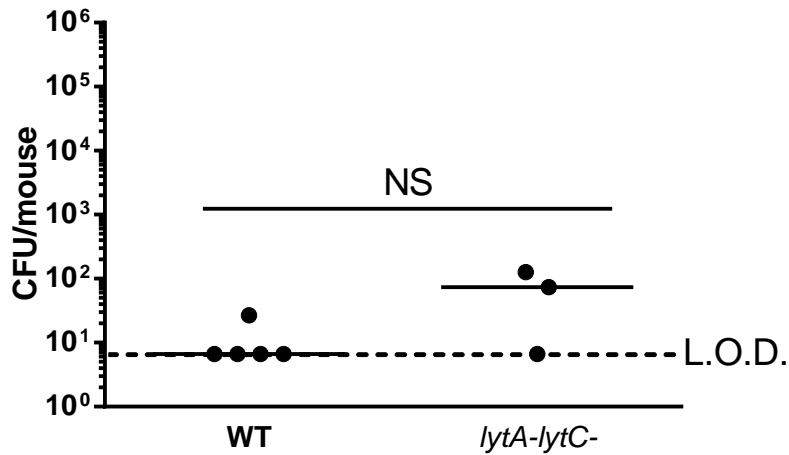

**Supplementary Figure 11: *LytA* and *LytC* in the challenger do not contribute to asymmetric competition.** 4-5 day old pups were intra-nasally inoculated with 10<sup>3</sup> CFU of serotype 23F WT resident for 6-8h. An isogenic WT or *lytA-lytC*<sup>-</sup> challenger was then introduced at 10<sup>1</sup> CFU. Challenger colonization density was determined 3 days later in nasal lavage samples. Groups were compared by two-tailed Mann-Whitney U test, NS: p=0.3, n=3-5. Median values are shown. L.O.D., limit of detection, NS, non-significant.

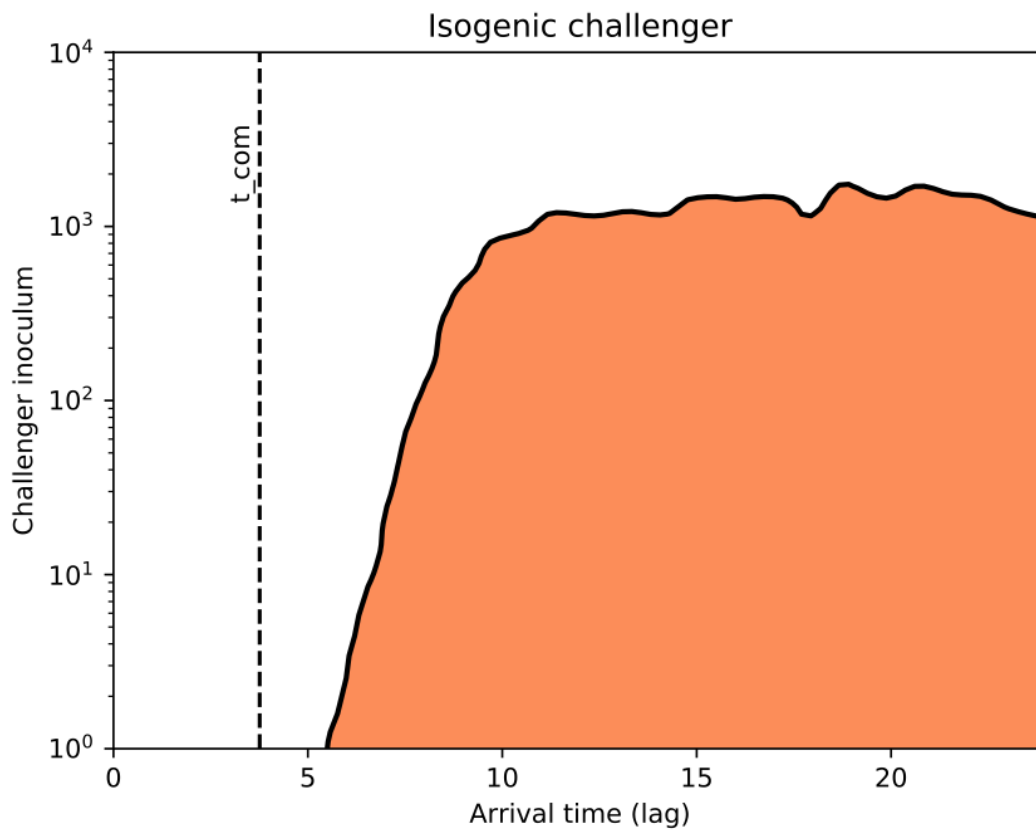

**Supplementary Figure 12: Isogenic case for 'resident always wins' with the stochastic model.** As in Figure 4a, the orange region shows the region of the parameter space for which the resident always wins. Plotted using the average of twenty runs of the stochastic model (with CTMC and tau-leaping), and Gaussian smoothing with variance 0.5 to produce a smooth interpolation in the plot.

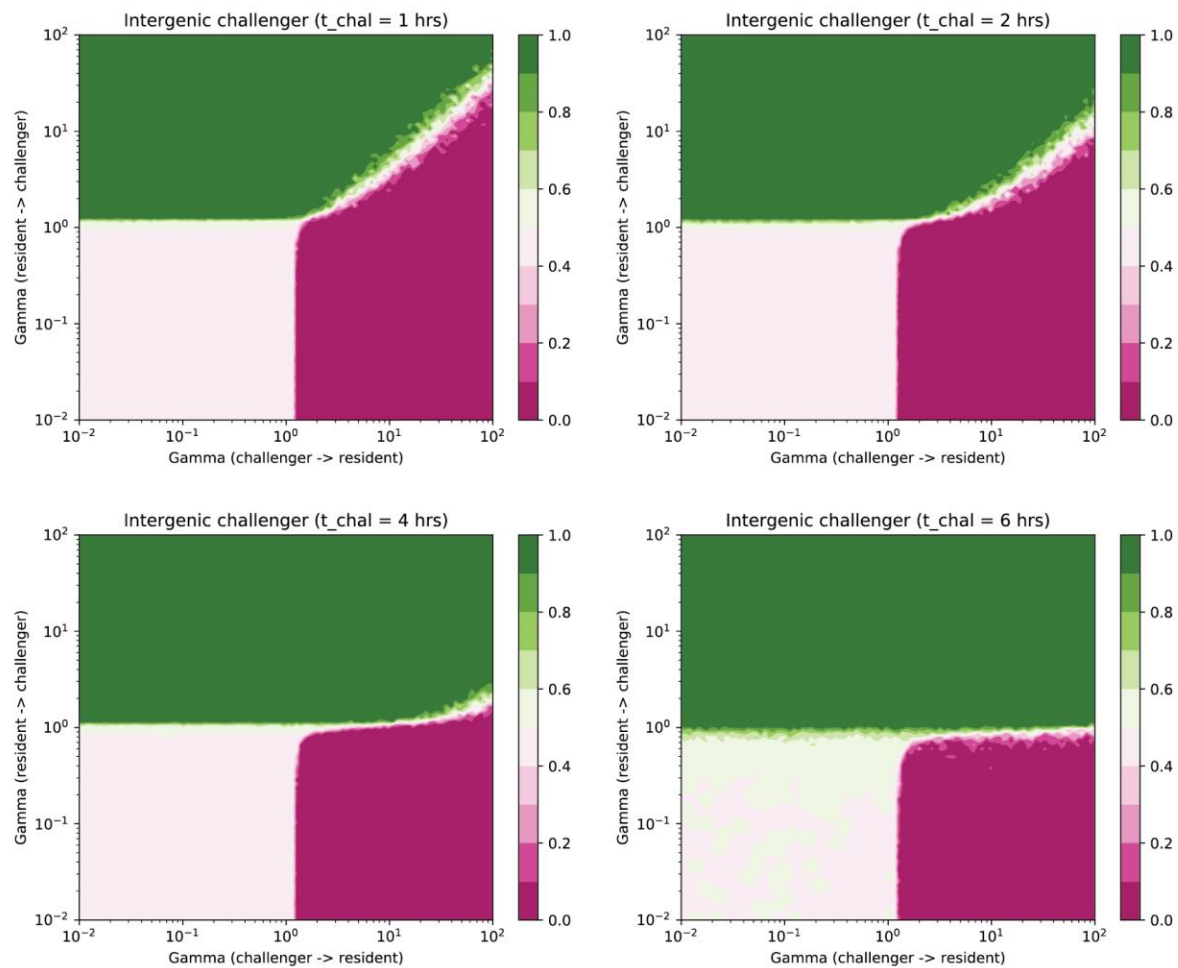

**Supplementary Figure 13: Domains of intergenic resident vs. challenger using the stochastic model.** The same plot as Figure 4c, for earlier times, one per panel: top left, 1h; top right 2h; bottom left 4h; bottom right 6h. Axes are the strength of competition  $\gamma$  between the strains, in the absence of competence. Coloured by average domain over twenty runs of the model, at the extremes green is 'resident wins', pink is 'challenger wins' and in the center white is coexistence. The white region of coexistence in the upper right diagonal for strong competition is an artifact of plotting contours, and is actually a hard boundary (when  $\gamma > 1$ , one strain always wins).

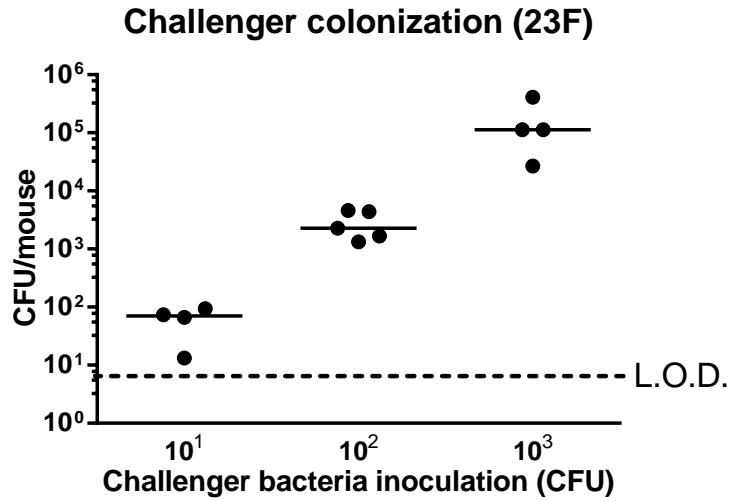

**Supplementary Figure 14: Challenger colonization density was proportional to the inoculum CFU when given at the same time as resident.** 4-5 day old pups were intra-nasally inoculated with  $10^3$  CFU of serotype 23F WT resident or an isogenic challenger ( $10^1$ - $10^3$  CFU) at the same time. Challenger colonization density was determined 3 days later in nasal lavage samples,  $n=4-5$ . Median values are shown. L.O.D., limit of detection.



**Supplementary Table 1: List of strains used in this study**

| Strain | Description                                                                                                                                                        | Reference or source |
|--------|--------------------------------------------------------------------------------------------------------------------------------------------------------------------|---------------------|
| P1121  | Serotype 23F clinical isolate                                                                                                                                      | 4                   |
| P1547  | Serotype 6A clinical isolate                                                                                                                                       | 5                   |
| P1397  | Streptomycin resistant P1121                                                                                                                                       | 6                   |
| P2499  | P1121 made streptomycin resistant by transformation with a PCR product containing the <i>rpsL</i> gene constructed using the genome template of P1726 <sup>7</sup> | This study          |
| P2578  | P2499 made kanamycin resistant by transformation with genomic DNA from P2405                                                                                       | This study          |
| P2397  | Spectinomycin resistant P1547                                                                                                                                      | 5                   |
| P2405  | Kanamycin resistant P1547                                                                                                                                          | 5                   |
| P2500  | P2499 with Janus cassette insertion into the <i>cbpD</i> locus                                                                                                     | This study          |
| P2575  | P1121 with Janus cassette insertion into the <i>cibAB</i> locus                                                                                                    | This study          |
| P2516  | P2500 with clean deletion of <i>cbpD</i>                                                                                                                           | This study          |
| P2576  | P2516 with Janus cassette insertion into the <i>cibAB</i> locus                                                                                                    | This study          |
| P2577  | <i>cbpD</i> mutation corrected in P2500 with P2499 DNA, Janus cassette insertion into the <i>cibAB</i> locus, corrected <i>cibAB</i> mutation with P2499 DNA       | This study          |
| P2579  | P2516 with Janus cassette insertion into the <i>comM</i> locus                                                                                                     | This study          |
| P2517  | P2499 with Janus cassette insertion into the <i>lytC</i> locus and transformed with genomic DNA from a <i>lytA</i> mutant P2282 <sup>8</sup>                       | This study          |
| P2076  | P1121 with Janus cassette insertion into the <i>comE</i> locus                                                                                                     | This study          |
| P2444  | A streptomycin resistant 6A strain transformed with genomic DNA from a <i>blp</i> mutant and made kanamycin resistant with DNA from P2405                          | This study          |

**Supplementary Table 2 List of primers used in this study**

| Gene target or purpose                                      | Primer                           | Sequence (5'-3')                                    |
|-------------------------------------------------------------|----------------------------------|-----------------------------------------------------|
| Construction of streptomycin resistant P2499                | <i>rpsL</i> forward              | GATAAGGACAGAACCAGTTCC                               |
|                                                             | <i>rpsL</i> reverse              | GC ATCCTATCTTACCAACGG                               |
| Construction of P2500 <i>cbpD</i> :: <i>Janus-cassette</i>  | <i>cbpD</i> upstream forward     | ACTAAGTTGGACAAAACGGTTGCTA                           |
|                                                             | <i>cbpD</i> upstream reverse:    | ATTAAAAATCAAACCTTTCATTCTTCTCCTTGAAAAATAATATA        |
|                                                             | <i>cbpD</i> Janus forward:       | TTATATTATTTTTCAAGGAGGAAGAATGAAAGTTTGATTTTTAAT       |
|                                                             | <i>cbpD</i> Janus reverse:       | AGGAAATTTCTCTACTCCAATTTCTATACCTTATGCTTTTGGAC        |
|                                                             | <i>cbpD</i> downstream forward:  | GTCCAAAAGCATAAGGTATAGAAAATTGGAGTAGGAGAAATTTCT       |
|                                                             | <i>cbpD</i> downstream reverse:  | CTGGGATTTTAAAATGCCACAGGAT                           |
| Construction of P2575 <i>cibAB</i> :: <i>Janus-cassette</i> | <i>cibAB</i> upstream forward    | TTTGTCAGACAAGAGTTCGATATATTCGATATTGACTCTGGGCG        |
|                                                             | <i>cibAB</i> upstream reverse:   | ATTATCCATTAATAAATCAAACGGATTGCTAGATAAGAAACACATTTTATG |
|                                                             | <i>cibAB</i> Janus forward:      | CTAAAAATGTGTTTCTTATCTAGCAATCCGTTTGATTTTTAATGGATAAT  |
|                                                             | <i>cibAB</i> Janus reverse:      | AAAAAAGGAGGAAAGTTCATGACATTATGCTTTTGGACGTTTAGTACCG   |
|                                                             | <i>cibAB</i> downstream forward: | CGGTACTAAACGTCCAAAAGCATAATGTCATTGAACTTCTCCTTTTTT    |
|                                                             | <i>cibAB</i> downstream reverse: | AATGCATACCAAGTCTGGTCTTGGGACAGATCTGCTTGGATTGTC       |
| Construction of P2516 with clean deletion of <i>cbpD</i>    | <i>cbpD</i> upstream forward     | ACTAAGTTGGACAAAACGGTTGCTA                           |
|                                                             | <i>cbpD</i> upstream reverse:    | TCTCTACTCCAATTTCTATACTTTCATTCTTCTCCTTGAAAA          |
|                                                             | <i>cbpD</i> downstream forward:  | TTTTTCAAGGAGGAAGAATGAAAGTATAGAAAATTGGAGTAGGAGA      |
|                                                             | <i>cbpD</i> downstream reverse:  | CTGGGATTTTAAAATGCCACAGGAT                           |
| Construction of P2579 <i>comM</i> :: <i>Janus-cassette</i>  | <i>comM</i> upstream forward     | AATTTCCCTTCTCTATATATGCCCCACGCTCTGGCTACCTCA          |
|                                                             | <i>comM</i> upstream reverse:    | ATTATCCATTAATAAATCAAACGGATTTTAGAGAAAGCCTGTTTTTATG   |
|                                                             | <i>comM</i> Janus forward:       | CATAAAAAACAGGCTTCTCTAAAAATCCGTTTGATTTTTAATGGATAAT   |
|                                                             | <i>comM</i> Janus reverse:       | GTAGGAAGGGAGAGAGAAGATGAAATTATGCTTTTGGACGTTTAGTACCG  |
|                                                             | <i>comM</i> downstream forward:  | CGGTACTAAACGTCCAAAAGCATAATTCATCTCTCTCCTCCTCTAC      |
|                                                             | <i>comM</i> downstream reverse:  | TTAGATGATAGAAATTATGAAAATTTGGAATATATTATAGAATA        |
| Construction of P2517 <i>lytC</i> :: <i>Janus-cassette</i>  | <i>lytC</i> upstream forward     | TCAAATTGAGGCCAAGAGAGCAGAA                           |
|                                                             | <i>lytC</i> upstream reverse:    | ATTAAAAATCAAACCTTCAATCTTCTCTCTATAAAAAATGTAA         |
|                                                             | <i>lytC</i> Janus forward:       | TTACATTTTTATAGGAGAGAAAGATTGAAAGTTTGATTTTTAAT        |
|                                                             | <i>lytC</i> Janus reverse:       | TCACATCCCTCTTCAAATCATCGCTTAATATTATGCTTTTGGAC        |
|                                                             | <i>lytC</i> downstream forward:  | GTCCAAAAGCATAATATTAAGCGATGATTTGAAAGAGGGATGTGA       |
|                                                             | <i>lytC</i> downstream reverse:  | TATTCTATTCTTACAAACCAGGTG                            |
| Primers for measuring <i>comX1</i> by SYBR green PCR        | <i>comX1</i> forward             | AGCAGGAAAGTCAGAAGCGT                                |
|                                                             | <i>comX1</i> reverse             | TCATCTAGCCAGAGACCCCC                                |
| Primers for measuring <i>comM</i> by SYBR green PCR         | <i>comM</i> forward              | TGGGACAAGATAGGCTGCAA                                |
|                                                             | <i>comM</i> reverse              | CGTGCGGATTTTCTTGCTA                                 |
| Primers for measuring <i>cbpD</i> by SYBR green PCR         | <i>cbpD</i> forward              | CTCTGTAGCCATCCACCGTC                                |
|                                                             | <i>cbpD</i> reverse              | GGGCAATGAAAACAGGCTGG                                |
| Primers for measuring <i>Tnfa</i> by SYBR green PCR         | <i>Tnfa</i> forward              | GACGTGGAAGTGGCAGAAGAG                               |
|                                                             | <i>Tnfa</i> reverse              | TTGGTGGTTTGAGTGTGAG                                 |
| Primers for measuring <i>Ifnb</i> by SYBR green PCR         | <i>Ifnb</i> forward              | GCACTGGGTGGAATGAGACT                                |
|                                                             | <i>Ifnb</i> reverse              | AGTGGAGAGCAGTTGAGGACA                               |

**Supplementary Table 3: Ability to estimate  $t_{com}$  and  $\beta$  from model simulations.** A simulation of the model with  $t_{com}$  and  $\beta$  specified as in the outer columns and rows, followed by a BOLFI fit to these simulations. The table entries show the mean posterior obtained for each parameter, with the numbers in brackets the 95% HPD. See supplementary figure 4 for a specific example with the posterior and samples.

|                   | $\beta = 0.3$                                                     | $\beta = 1.1$                                                     | $\beta = 2.0$                                                      |
|-------------------|-------------------------------------------------------------------|-------------------------------------------------------------------|--------------------------------------------------------------------|
| $t_{com} = 2$ hrs | $t_{com} = 3.48$ (1.03-5.75) hrs<br>$\beta = 0.63$ (0.001-1.85)   | $t_{com} = 3.03$ (1.02 – 5.79) hrs<br>$\beta = 1.53$ (0.12-2.90)  | $t_{com} = 3.41$ (1.10-5.81) hrs<br>$\beta = 2.00$ (0.673-3.00)    |
| $t_{com} = 4$ hrs | $t_{com} = 2.40$ (1.00-5.25) hrs<br>$\beta = 1.10$ (0.002-2.59)   | $t_{com} = 3.47$ (1.36-5.98) hrs<br>$\beta = 1.94$ (0.543 – 3.00) | $t_{com} = 3.94$ (1.49 – 5.99) hrs<br>$\beta = 1.87$ (0.443-3.00)  |
| $t_{com} = 6$ hrs | $t_{com} = 2.70$ (1.00-5.58) hrs<br>$\beta = 1.09$ (0.009 – 2.49) | $t_{com} = 4.10$ (1.61-6.00) hrs<br>$\beta = 1.85$ (0.533-2.99)   | $t_{com} = 3.96$ (1.51- 6.00) hrs<br>$\beta = 1.83$ (0.509 – 2.99) |

**Supplementary Table 4: See excel file SI Table 4.**

**Supplementary Table 5: Conservation of competence machinery in serotype 3 genomes.** We have separately calculated the frequency and dN/dS of each gene in the entire Massachusetts population of 616 genomes and 93 serotype 3 only genomes.

| Gene  | TIGR4 ID            | CLS ID   | Isolates present (/616) | Isolates present (/93) | dN/dS (all) | dN/dS (serotype 3) |
|-------|---------------------|----------|-------------------------|------------------------|-------------|--------------------|
| cbpD  | SP_2201             | CLS00029 | 616                     | 93                     | 0.35        | 0.32               |
| comM  | SP_1945             | CLS01685 | 616                     | 92                     | 0.19        | 0.68               |
| cibA  | SP_0125             | CLS00190 | 605                     | 93                     | 0.59        | 0.17               |
| cibB  | SP_0124             | CLS00189 | 605                     | 93                     | 0.52        | 0.12               |
| cibC  | SP_0122             | CLS00187 | 616                     | 93                     | 0.27        | 0.53               |
| comA  | SP_0042             | CLS00122 | 616                     | 93                     | 0.16        | 0.22               |
| comB  | SP_0043             | CLS00123 | 615                     | 93                     | 0.45        | 0.28               |
| comC  | SP_2237             | CLS00064 | 614                     | 93                     | 0.71        | 0.74               |
| comD  | SP_2236             | CLS00063 | 616                     | 93                     | 0.26        | 0.61               |
| comE  | SP_2235             | CLS00062 | 616                     | 93                     | 0.34        | 0.40               |
| comEB | SP_0744             | CLS00678 | 615                     | 93                     | 0.12        | 0.32               |
| comEA | SP_0954             | CLS00859 | 614                     | 93                     | 0.24        | 0.16               |
| comEC | SP_0955             | CLS00860 | 608                     | 93                     | 0.34        | 0.25               |
| comX  | SP_0014/<br>SP_2006 | CLS01734 | 605                     | 93                     | 0.31        | 1.43               |
| comYF | SP_2048             | CLS01771 | 616                     | 93                     | 0.30        | 0.23               |
| comYE | SP_2049             | CLS01772 | 616                     | 93                     | 0.38        | 0.06               |
| comYD | SP_2050             | CLS01773 | 614                     | 93                     | 0.37        | 0.24               |
| comYC | SP_2051             | CLS01774 | 616                     | 93                     | 0.84        | 0.32               |
| comYB | SP_2052             | CLS01775 | 616                     | 93                     | 0.18        | 0.23               |
| comYA | SP_2053             | CLS01776 | 616                     | 93                     | 0.14        | 0.22               |
| comFC | SP_2207             | CLS00035 | 616                     | 93                     | 0.12        | 0.24               |
| comFA | SP_2208             | CLS00036 | 616                     | 93                     | 0.10        | 0.80               |

**Supplementary Table 6: Comparison of times taken to solve model equations using numerical integration.** For each method the time taken to run 100 integrals with parameters '`--t_com 3.8 --t_chal 1 --C_size 10 --beta 1.48 --R_size 10 --t_end 36 --g-RC 0.01 --g-CR 0.01 --resolution 2000`' is shown. For the CTMC solutions, functions optimised by using just-in-time (JIT) compilation with numba, which increased their speed roughly five-fold.

| <b>Model</b> | <b>Method</b>                       | <b>Time for 100 integrals</b> |
|--------------|-------------------------------------|-------------------------------|
| ODEs         | scipy.odeint                        | 0.28 s                        |
| SDEs         | sdeint.itoint                       | 39.07 s                       |
| CTMC         | Gillespie (JIT)                     | 74.74 s                       |
|              | Tau-leaping (JIT)<br>[tau = 0.001h] | 6.38 s                        |

## Supplementary References

1. Lam, S. K., Pitrou, A. & Seibert, S. Numba: A LLVM-based Python JIT Compiler. *Proceedings of the Second Workshop on the LLVM Compiler Infrastructure in HPC* 7:1-7:6 (2015). doi:10.1145/2833157.2833162
2. Gillespie, D. T. Approximate accelerated stochastic simulation of chemically reacting systems. *J. Chem. Phys.* **115**, 1716–1733 (2001).
3. Cao, Y., Gillespie, D. T. & Petzold, L. R. Avoiding negative populations in explicit Poisson tau-leaping. *J. Chem. Phys.* **123**, 54104 (2005).
4. McCool, T. L., Cate, T. R., Moy, G. & Weiser, J. N. The immune response to pneumococcal proteins during experimental human carriage. *J. Exp. Med.* **195**, 359–365 (2002).
5. Kono, M. *et al.* Single Cell Bottlenecks in the Pathogenesis of *Streptococcus pneumoniae*. *PLoS Pathog.* **12**, (2016).
6. Zangari, T., Wang, Y. & Weiser, J. N. *Streptococcus pneumoniae* transmission is blocked by type-specific immunity in an infant mouse model. *MBio* **8**, (2017).
7. Zafar, M. A., Wang, Y., Hamaguchi, S. & Weiser, J. N. Host-to-Host Transmission of *Streptococcus pneumoniae* Is Driven by Its Inflammatory Toxin, Pneumolysin. *Cell Host Microbe* **21**, 73–83 (2017).
8. DeBardleben, H. K., Lysenko, E. S., Dalia, A. B. & Weiser, J. N. Tolerance of a phage element by *Streptococcus pneumoniae* leads to a fitness defect during colonization. *J. Bacteriol.* **196**, 2670–2680 (2014).
